# Supplementary material
Source: publisher site journal article supplement (https://www.dovepress.com/article/216634)
Supplement: Supplementary file 1 [file get_supplementary_file.php]

Supplementary Table 1: International Classification of Disease (ICD) codes used to identify phacomatosis cases

| <b>Phacomatosis</b>            | <b>ICD 10</b> | <b>ICD 9</b> | <b>ICD 8</b>    |
|--------------------------------|---------------|--------------|-----------------|
| Neurofibromatosis              | Q85.0         | 237H         | 743,40          |
| Tuberous sclerosis             | Q85.1         | 759F         | 759,60          |
| Peutz-Jeghers syndrome         | Q85.8A        | 759G         | -               |
| Sturge-Weber syndrome          | Q85.8B        | 759G         | 759,82          |
| Von Hippel-Lindau syndrome     | Q85.8C        | 759G         | 759,87          |
| Ataxia telangiectasia          | G11.3         | 334W         | 759,86          |
| Other specified phacomatosis   | Q85.8         | 759G         | 759,82 ; 759,87 |
| Other unspecified phacomatosis | Q85.9         | -            | -               |
